# Supplementary material
Source: PubMed Central journal article supplement (PMC2664395)
Supplement: NIHMS59901-supplement-supplement_1.pdf [file NIHMS59901-supplement-supplement_1.pdf]

## Tables

Table 1. Pairwise dn/ds values for each CG2056 homolog calculated in PAML (Yang 1997; Yang 2007).

In each cell, the format is:

dn/ds    dn  
          ds

|                | Dari_CG2056_G1 | Dari_CG2056_G2 | Dmoj_CG2056_G1 | Dmoj_CG2056_G2 |
|----------------|----------------|----------------|----------------|----------------|
| Dari_CG2056_G1 |                | 0.0337         |                |                |
| Dari_CG2056_G2 | <b>0.711</b>   |                | 0.0474         |                |
| Dmoj_CG2056_G1 | <b>0.053</b>   | 0.0017         |                | 0.0351         |
| Dmoj_CG2056_G2 | <b>0.461</b>   | 0.0322         | <b>0.445</b>   | 0.0788         |
|                |                | 0.0366         | 0.0254         | 0.0385         |
|                |                | 0.0794         | <b>0.333</b>   | <b>0.452</b>   |
|                |                |                | 0.0762         | 0.0852         |

Supplementary Table 1. Primers used in this study.

|                                                       |                                                                                                         |
|-------------------------------------------------------|---------------------------------------------------------------------------------------------------------|
| Xe distal breakpoint and <i>D. arizonae</i> CG2056_G1 | ATGCCACCAGATACCATGTACTGTC<br>(1297116-1297141),<br>GACCTCGGTGCGATAATTGGTGAAT<br>(12077045-12077069)     |
| Xe proximal breakpoint                                | CTCGGTGTCTTATCTAGGGAACATGAG<br>(1298811-1298785),<br>ATTTACCTTTGGACGGTGCTATAGAGG<br>(12078339-12078313) |
| <i>D. mojavensis</i> CG2056_G1                        | CAACGGAGGCGACGAAGAAGTTAAATTC<br>(1297738-1297765),<br>ATGCCACCAGATACCATGTACTGTC<br>(1297116-1297141)    |
| <i>D. mojavensis</i> CG2056_G2                        | GAACTTGTAACCGCTGCAGGATTGTT<br>(1295186-1295212),<br>ATGCCACCAGATACCATGTACTGTC<br>(1296085-1296060)      |
| <i>D. arizonae</i> CG2056_G2                          | CCAGACACGAAACGTTGCAGTTTG<br>(1294697-1294720),<br>ATGCCACCAGATACCATGTACTGTC<br>(1296085-1296060)        |

|                              |                                                                                                                          |
|------------------------------|--------------------------------------------------------------------------------------------------------------------------|
| D. mojavensis CG2056_G1 cDNA | CAACGGAGGCGACGAAGAAGTTAAATTC<br>(1297738 -1297765) (reverse primer),<br>TCAGGAGCACTCCTTGTTTTTCGTTAC<br>(1296160-1296185) |
|------------------------------|--------------------------------------------------------------------------------------------------------------------------|
